1 **Deriving  $C_4$  photosynthesis parameters by fitting intensive  $A/C_i$  curves**

2 Haoran Zhou<sup>1</sup>, Erol Akçay and Brent Helliker

3 Department of Biology, University of Pennsylvania, PA19104

4 Corresponding author: Haoran Zhou

5 Address: 433 S University Ave. 314 Leidy Labs,

6 Department of Biology, University of Pennsylvania, PA19104

7 Email: haoranzh@sas.upenn.edu

8 Running title: Deriving  $C_4$  photosynthesis parameters

9 Received \_\_\_\_\_; accepted \_\_\_\_\_

## ABSTRACT

1  
2       Photosynthetic assimilation versus intercellular  $CO_2$  response curves ( $A/C_i$ ) are  
3  
4 widely measured to estimate photosynthetic parameters for  $C_3$  species; however, few  
5 parameters have been reported for  $C_4$  because of lacking estimation methods. In the  
6 current study, we took the frameworks of widely-used estimation methods for  $C_3$  and  
7 built estimation tools to fit intensive  $A/C_i$  curves (6-8 more sampling points) for  $C_4$   
8 based on two different assumptions about photosynthesis models and two fitting pro-  
9 cedures with estimation improvements. Five photosynthetic parameters are obtained:  
10 maximal Rubisco carboxylation rate ( $V_{cmax}$ ), electron transport rate ( $J$ ), day respira-  
11 tion ( $R_d$ ), maximal PEPc carboxylation rate ( $V_{pmax}$ ) and mesophyll conductance ( $g_m$ ).  
12 Simulation tests with random errors, out of sample tests and Chlorophyll fluorescence  
13 measurements validated the estimation methods. Sensitivity analysis showed  $V_{cmax}$ ,  
14  $J$  and  $V_{pmax}$  are robust to variation in the input parameters, while  $R_d$  and  $g_m$  varied.  
15 The two photosynthesis model assumptions yielded consistent results, although they  
16 are different from each other in whether ATP could freely transport between RuBP  
17 regeneration and PEP regeneration processes. For the two fitting procedures, one is  
18 preferable (lower estimation error) if additional measurements (e.g. fluorescence) are  
19 available, however, the two procedures support each other and we recommend using  
20 both to achieve more accurate results.

21 *Subject headings:*  $C_4$ , photosynthesis parameters,  $A/C_i$  curves, nonlinear curve fitting

## 1 INTRODUCTION

2 Key photosynthetic parameters allow for the assessment of how biochemical and biophysical  
3 components of photosynthesis affect net carbon assimilation in response to environmental  
4 changes, genotypic differences and genetic modification. The changes in net assimilation ( $A$ ) that  
5 occur along with the changes of intercellular  $CO_2$  concentration ( $C_i$ ) —or  $A/C_i$  curves— are  
6 widely used to fit photosynthetic parameters for  $C_3$  species. Sharkey et al. (2007) developed a  
7 method for estimating photosynthesis parameters of  $C_3$  species using the  $C_3$  photosynthesis model  
8 of Farquhar et al. (1980; FvCB model), that has been one of the most widely used tools since it is  
9 based exclusively on  $A/C_i$  curves, which are easy to measure in both lab and field conditions.

10 Fewer estimates of photosynthetic parameters have been reported for  $C_4$  species, as there  
11 has been a lack of accessible  $C_4$  estimation methods. Several recent studies, however, used  $A/C_i$   
12 curves to estimate  $C_4$  photosynthesis parameters (Yin et al. 2011b; Ubierna et al. 2013; Bellasio  
13 et al. 2015). These studies usually use partial  $A/C_i$  curves; measuring assimilation rates for only  
14 a few  $CO_2$  concentrations coupled to ancillary measurements of chlorophyll fluorescence and/or  
15 2 %  $O_2$ . While these estimation methods lead to good estimates of photosynthetic parameters,  
16 the additional measurement requirements make estimation more cumbersome for field work or  
17 large-scale sampling.

18 Gu et al. (2010) have pointed out several issues with previous estimation methods using  
19  $A/C_i$  curves. First, the structure of the FvCB model makes it easy to be over-parameterized.  
20 Second, a general shortcoming for both  $C_3$  and  $C_4$  estimation methods, is that they require an  
21 artificial assignment of the RuBP regeneration and Rubisco carboxylation limitation states for the

1  $A/C_i$  (Xu & Baldocchi 2003; Ethier et al. 2006; Ubierna et al. 2013; Bellasio et al. 2015), which  
2 has turned out to be problematic (Type I methods). These methods assume constant transition  
3 points of limitation states for different species. Furthermore, Type I methods tend to minimize  
4 separate cost functions of different limitation states instead of minimizing a joint cost function.  
5 Some recent estimation methods ameliorate these problems by allowing the limitation states to  
6 vary at each iterative step of minimizing the cost function (Type II methods; Dubois et al. 2007;  
7 Miao et al. 2009; Yin et al. 2009; Gu et al. 2010). However, for these type II methods, additional  
8 degrees of freedom in these "auto-identifying" strategies can lead to over-parameterization if  
9 limitation states are allowed to change freely for all data points. Gu et al. (2010) also pointed out  
10 that existing Type I and Type II methods fail to check for inadmissible fits, which happen when  
11 estimated parameters lead to an inconsistent identification of limitation states from the formerly  
12 assigned limitation states.

13 Theoretically, it is possible to estimate photosynthetic parameters for  $C_4$  species by  
14 exclusively fitting  $A/C_i$  curves to a  $C_4$  photosynthesis model, but such approaches encounter two  
15 problems. First, at low  $C_i$ , the slope of  $A/C_i$  is very steep and the assimilation rate saturates  
16 quickly. Second,  $C_4$  species have more photosynthetic parameters as the carbon concentrating  
17 mechanism adds complexity. Here we present a  $A/C_i$ -based  $C_4$  parameter estimation protocol  
18 that is solely  $A/C_i$ -based, and attempts to solve the general problems and drawbacks outlined  
19 above.

20 We extend the framework of Sharkey et al. (2007) to estimate photosynthetic parameters  
21 for  $C_4$  species based on intensive  $A/C_i$  curves ( $A/C_i$  curves with 6-8 more sampling points  
22 than the common  $A/C_i$  for  $C_3$  species), examine two different assumptions about the ATP, one

1 product of electron transport, distribution between RuBP regeneration and PEP regeneration in  $C_4$   
2 photosynthesis models and further examine two separate fitting procedures. We estimate the five  
3 photosynthesis parameters: (1) maximum carboxylation rate allowed by ribulose 1,5-bisphosphate  
4 carboxylase/oxygenase (Rubisco) ( $V_{cmax}$ ), (2) rate of photosynthetic electron transport ( $J$ ), (3) day  
5 respiration ( $R_d$ ), (4) maximal PEPc carboxylation rate ( $V_{pmax}$ ), and (5) mesophyll conductance  
6 ( $g_m$ ). This approach yields the following improvements to eliminate common problems occurring  
7 in previous  $C_3$  and  $C_4$  estimation methods: avoiding over-parameterization, maximizing joint cost  
8 function, freely determining transition points instead of assigning in advance, and checking for  
9 inadmissible fits.

## 10 **THE MODEL**

### 11 **Diffusion processes**

12 In the  $C_4$  photosynthesis pathway, the enzyme PEPc first fixes  $CO_2$  into  $C_4$  compound and  
13 then, releases  $CO_2$  into bundle sheath cells, where photosynthesis reactions of  $C_3$  cycle occur.  
14 The diffusion of  $CO_2$  starts from ambient atmosphere through stomata into intercellular spaces,  
15 then into the mesophyll cells, finally into the bundle sheath cells. The  $A/C_i$  curves give the  
16 intercellular  $CO_2$  concentration ( $C_i$ ). Thus, in our model, we need to further consider the  $CO_2$   
17 concentration in mesophyll cells ( $C_m$ , eq. (1)) and the  $CO_2$  concentration in bundle sheath cells  
18 ( $C_{bs}$ , eq. (2)).  $C_m$  is determined by four processes as follows: the diffusion of  $CO_2$  from the  
19 intercellular space ( $C_i$ ) to mesophyll through mesophyll plasma membrane, the fixation of  $CO_2$   
20 by PEP carboxylation ( $V_p$ ), bundle sheath leakage from bundle sheath cells back to mesophyll  
21 ( $g_{bs}(C_{bs} - C_m)$ ) and mitochondrial respiration rate at daytime in mesophyll cells ( $R_{dm}$ ).  $C_{bs}$  is

1 determined by PEP carboxylation ( $V_p$ ), bundle sheath leakage gross assimilation and daytime  
 2 mitochondrial respiration rate in bundle sheath cells ( $R_{dbs}$ ). The total daytime respiration ( $R_d$ ) is  
 3 the sum of  $R_{dm}$  and  $R_{dbs}$  (eq. (3)).

$$\frac{\partial C_m}{\partial t} = (C_i - C_m)g_m - [V_p - g_{bs}(C_{bs} - C_m)] + R_{dm} \quad (1)$$

$$\frac{\partial C_{bs}}{\partial t} = V_p - g_{bs}(C_{bs} - C_m) - A_g + R_{dbs} \quad (2)$$

$$R_d = R_{dbs} + R_{dm}, \quad (3)$$

4 where  $g_m$  is the mesophyll conductance,  $g_{bs}$  is the bundle sheath conductance for  $CO_2$  and  $A_g$   
 5 is the gross assimilation rate. We assume the whole system is in the steady state and set the  
 6 right-hand sides of eq. (1) and (2) equal to zero. The net assimilation rate  $A_n$  is equal to  $A_g - R_d$ .  
 7 Then, at equilibrium,

$$A_n = V_p - g_{bs}(C_{bs} - C_m) - R_{dm} \quad (4)$$

$$A_n = (C_i - C_m)g_m. \quad (5)$$

8 Next, we consider the  $O_2$  in the bundle sheath cells ( $O_{bs}$ ).

$$\frac{\partial O_{bs}}{\partial t} = \alpha A_g - g_{bso}(O_{bs} - O_m) \quad (6)$$

$$g_{bso} = g_{bs} \frac{D_{o_2} S_{o_2}}{D_{co_2} S_{co_2}}, \quad (7)$$

9 where  $g_{bso}$  is the bundle sheath conductance for  $O_2$ ,  $O_m$  is the  $O_2$  concentration at mesophyll cell  
 10 and  $\alpha$  ( $0 < \alpha < 1$ ) denotes the fraction of  $O_2$  evolution occurring in the bundle sheath.  $D_{o_2}$  and  
 11  $D_{co_2}$  are the diffusivities for  $O_2$  and  $CO_2$  in water and  $S_{o_2}$  and  $S_{co_2}$  are the Henry constants, which  
 12 gives

$$g_{bso} = 0.047g_{bs}. \quad (8)$$

1 At equilibrium, eq. (6) =0. And we have:

$$O_{bs} = \frac{\alpha A_g}{0.047 g_{bs}} + O_m. \quad (9)$$

2 Here we assume  $O_m=O_a$ , which is the ambient  $O_2$  concentration, as is done in other studies (von  
3 Caemmerer 2000; Yin et al. 2011b). Eq. (9) indicates that  $O_2$  will accumulate in the bundle  
4 sheath. If  $\alpha=0$ , then,  $O_{bs}=O_m=O_a$ . With a  $\alpha >0$ ,  $O_{bs}$  is higher than  $O_m$  or  $O_a$ , because the bundle  
5 sheath is a gas-tight compartment (low  $g_{bs}$ ) that prevents the  $O_2$  produced by photosynthesis from  
6 diffusing out of the cells.

## 7 **PEP carboxylation**

8 PEP carboxylation is limited either by PEPc reaction rate ( $V_{pc}$ ) or PEP regeneration ( $V_{pr}$ ).  $V_{pc}$   
9 follows a Michaelis-Menten equation:

$$V_{pc} = \frac{V_{pmax} C_m}{C_m + K_p}, \quad (10)$$

10 where  $V_{pmax}$  is the maximum PEPc carboxylation rate and  $K_p$  is the Michaelis-Menten coefficient  
11 of  $CO_2$ .  $V_p$  usually is assumed to have an upper bound ( $V_{pr}$ ) set by PEP regeneration rate:

$$V_p = \min (V_{pc}, V_{pr}). \quad (11)$$

## 12 **FvCB model for the $C_3$ cycle**

13  $A_n$  represents the assimilation rate by the  $C_3$  cycle of the  $C_4$  photosynthesis pathway, thus it  
14 can be modeled by a modified FvCB model of  $C_3$  photosynthesis (Farquhar et al. 1980). In  
15 this model,  $A_n$  is given by one of two equations, each corresponding to limitation by a different  
16 reaction. The first is the Rubisco carboxylation limited state ( $A_c$ ), when there's a saturating supply

1 of the substrate (RuBP) for Rubisco and the reaction rate is given by the enzyme kinetics of  
2 Rubisco. This normally occurs when the  $CO_2$  concentration is low. The second is the RuBP  
3 regeneration limited state ( $A_j$ ), which normally indicates the electron transport limitation in the  
4 light reaction of photosynthesis. The FvCB model computes  $A$  separately for each of the two  
5 states and takes the minimum of them to be the net assimilation rate.

6 The assimilation rate under Rubisco carboxylation rate,  $A_c$ , of  $C_4$  species can be modeled as

$$A_c = \frac{V_{cmax}(C_{bs} - \gamma^* O_{bs})}{C_{bs} + K_c(1 + \frac{O_{bs}}{K_o})} - R_d, \quad (12)$$

$$\gamma^* = \frac{V_{omax}K_c}{V_{cmax}K_o}, \quad (13)$$

7 where  $V_{omax}$  is the maximum oxygenation rate allowed by Rubisco. The parameter  $\gamma^*$  represents  
8 the specificity of Rubisco and is considered as a constant given temperature among  $C_4$  species.

9 When modeling the RuBP regeneration limited assimilation rate,  $A_j$ , we need to take into  
10 account the cost of  $C_4$  photosynthesis pathway into consideration. The cost of  $C_4$  photosynthesis  
11 stems from the 2 additional ATP/ $CO_2$  in PEPc carboxylation and regeneration. The ATP cost  
12 come out of the electron transport of the light reactions (Hatch, 1987). This cost will be reflected  
13 in the  $A_j$  and  $V_{pr}$ .  $V_{pr}$  in eq. (11) is defined as proportional to electron transport rate ( $J$ ),

$$V_{pr} = xJ/2, \quad (14)$$

14 where  $x$  is the fraction of total electron transport that is used for producing ATP for the PEP  
15 regeneration. The factor 1/2 accounts for the fact that when the PEPc carboxylate one molecule of  
16  $CO_2$ , it needs 2 additional electron transport.

17 Then, we need to specify how ATP, or more generally electron transport, is allocated between  
18 PEP and RuBP regeneration. Two different equations based on two assumptions about electron



1 transport has been used in the literature to describe RuBP regeneration process in  $C_4$  plants. In the  
2 first equation (von Caemmerer 2000), a constant proportion of electron transport is distributed for  
3 PEP carboxylation/regeneration; thus,  $A_j$  is given as follows:

$$A_j = \frac{(1-x)J(C_{bs} - \gamma^*O_{bs})}{4C_{bs} + 8\gamma^*O_{bs}} - R_d, \quad (15)$$

4 where the factor  $(1-x)/2$  in the first term represents the cost of CCM in  $C_4$  compared to the  
5  $C_3$  pathway. This equation assumes that no matter how much electron transport is used for  
6 PEP carboxylation/regeneration,  $xJ$  is confined for this use, thus, only  $(1-x)$  is left for RuBP  
7 regeneration (Supplementary Material I, II).

8 In the second equation (Vico and Porporato 2008; Osborne and Sack 2012), electron transport  
9 can be freely distributed between PEP carboxylation/regeneration and RuBP regeneration.

10  $2V_{pr}=xJ$  denotes the maximal fraction of electron transport that could be used for PEP  
11 carboxylation/regeneration instead of being confined solely for PEP carboxylation/regeneration as  
12 in the first model (Supplementary Material III).  $A_j$  is given by

$$A_j = \frac{(J - 2V_p)(C_{bs} - \gamma^*O_{bs})}{4C_{bs} + 8\gamma^*O_{bs}} - R_d, \quad (16)$$

13 where we deducted  $2V_p$  to account for the cost of CCM in the RuBP regeneration equation.

14 The  $A_n$  of  $C_4$  species is limited by two states as follows:

$$A_n = \min(A_c, A_j). \quad (17)$$

15 In the two models, we assumed  $R_{dm}=R_{dbs}$ , thus,

$$R_{dm} = R_{dbs} = 1/2R_d. \quad (18)$$

## 1 ESTIMATION PROTOCOL

2 We performed intensive  $A/C_i$  curves on nine different  $C_4$  species to develop and examine the  
3 efficacy of our estimation tools: *Zea mays* L., *Eragrostis trichodes* (Nutt.) Alph. Wood,  
4 *Andropogon virginicus* L., *Schizachyrium scoparium* (Michx.) Nash, *Panicum virgatum*  
5 L., *Panicum amarum* Elliott, *Setaria faberi* Herrm., *Sorghastrum nutans* (L.) Nash and  
6 *Tripsacum dactyloides* (L.) L. The intensive  $A/C_i$  curves measured more sample points under  
7 more  $CO_2$  concentrations than the default curve used for  $C_3$  species. Here we set the  $CO_2$   
8 concentrations as 400, 200, 50, 125, 150, 175, 200, 225, 250, 275, 300, 325, 350, 400, 500,  
9 600, 700, 800, 1000, 1200, 1400 ppm under light intensity of  $1500 \mu mol m^{-2} s^{-1}$ . The data sets  
10 were obtained using LI-6400 (LI-COR Inc., Lincoln, NE, USA). If the stomatal conductance of a  
11 species does not decrease quickly at high  $CO_2$ , then the sample points at the high  $CO_2$  level can  
12 be increased. First, we checked whether the estimation methods based on different assumptions  
13 in electron transport yielded different results. Second, we used two different fitting procedures to  
14 compare their estimation results and their advantages/disadvantages. Third, in order to test the  
15 reliability of the estimated parameters, we conducted sensitivity analyses of parameter estimates  
16 to variations in the input parameters. Finally, we conducted simulation tests using  $A/C_i$  curves  
17 generating with known parameters and added random error, out of sample test and Chlorophyll  
18 fluorescence measurement to validate the estimation methods.

19 We built the estimation methods using the non-linear curve-fitting routine in MS Excel and R  
20 to get solutions that minimize the squared difference between observed and predicted assimilation  
21 rates ( $A$ ). There are five parameters that need to be estimated by fitting the  $A/C_i$  curve. They

1 are  $V_{cmax}$ ,  $J$ ,  $R_d$ ,  $V_{pmax}$  and  $g_m$ . We are using a  $x$  with 0.4 as von Caemmerer (2000) suggested.  
2 Several studies reported robust measurements of 0.4 for different species (Ubierna et al. 2013;  
3 Yin et al. 2011b; Bellasio et al. 2015). The limitation states of assimilation rate change with  $C_i$   
4 in  $A/C_i$  curves. Under the low  $C_i$ , photosynthesis would be limited by Rubisco carboxylation  
5 (denoted limitation: 1). Under the high  $C_i$ , photosynthesis would be limited by RuBP regeneration  
6 (denoted limitation: 2). The limitation of PEPc carboxylation and PEP regeneration has been taken  
7 into account in eq. (11).

8 Below is a description of the estimation process and algorithm and further details are shown  
9 in Supplementary Materials. The estimation methods are available in both Excel (Supplementary  
10 Material I and II) and R ("C4Estimation").

## 11 **Input data sets and preliminary calculations**

12 The input data sets are the leaf temperature during measurements, atmosphere pressure, two  $CO_2$   
13 bounds (CaL and CaH discussed in the following section), and the assimilation rates ( $A$ ) and the  
14  $C_i$ s (in ppm) in the  $A/C_i$  curve. Also, reasonable initial values of output parameters need to be  
15 given in the output section.  $C_i$  will be adjusted from the unit of ppm to the unit of Pa inside the  
16 program as suggested by Sharkey et al. (2007).

## 17 **Estimating limitation states**

18 We set upper and lower limits to the value of  $C_i$  at which the assimilation transitions between  
19 limitation states, and to avoid over-parameterization, pre-assigned limitation states at the lower  
20 and upper ends of the  $C_i$  range. We assumed that under very low  $C_i$  (CaL),  $A$  is given by  $A_c$  and  
21 under very high  $C_i$  (CaH)  $A$  is given by  $A_j$  (Fig. 1). To find a suitable value for a transition point,

1 we suggest setting CaL as 15 Pa initially, then adjusting based on the preliminary results. The last  
2 three points can initially be set as being limited by  $A_j$  primarily (based on the three points, we  
3 can set how much CaH is) or use 65 Pa as the first trial. The points between CaL to CaH can be  
4 limited by either  $A_c$  or  $A_j$  and will be freely determined by minimizing the cost function. The  
5 range of freely determined points can be adjusted by users by setting appropriate CaL and CaH.  
6 In the column of "Estimate Limitation", whether the data points are limited by  $A_c$  (represented  
7 by "1"),  $A_j$  (represented by "2") or freely vary between  $A_c$  and  $A_j$  limitations (represented by  
8 "0") will be determined automatically by the given values of CaL and CaH. One can input "-1"  
9 to disregard a data pair. Users can adjust limitation states according to how many points and the  
10 range of  $C_i$  they have in their  $A/C_i$  curves.

## 11 **Estimation algorithm and two fitting procedures**

12 The objective of our estimation methods is to minimize the following joint cost function (eq. (22))  
13 by varying the above five output parameters ( $V_{cmax}$ ,  $J$ ,  $V_{pmax}$ ,  $R_d$  and  $g_m$ ).

$$f = \sum_{i=1}^n [\text{If } (C_i < C_t), A = A_{ci}, \text{ otherwise } A = A_{ji}] - A_{mi}]^2 \quad (19)$$

$$\text{Constraint: } CaL < C_t < CaH, \quad (20)$$

14 where  $n$  is the total number of observations,  $C_t$  is the intercellular  $CO_2$  at which photosynthesis  
15 transitions from Rubisco carboxylation limited to RuBP regeneration limited,  $A_{ci}$  and  $A_{ji}$  are  
16 Rubisco carboxylation limited and RuBP regeneration limited net assimilation rate respectively,  
17  $A_{mi}$  is the observed net assimilation rate and CaL and CaH represent the lower and upper bounds  
18 of  $C_t$ . As  $C_t$  is determined by the function of all the estimation parameters and is not easy to get

1 its explicit form, we use the following objective function:

$$A_i = [\text{If } (C_i \leq CaL), A_{ci}; \text{If } (C_i \geq CaH), A_{ji}; \text{If } (CaL < C_i < CaH), \min(A_{ci}, A_{ji})] \quad (21)$$

$$f = \sum_{i=1}^n (A_i - A_{mi})^2. \quad (22)$$

2 If  $C_i$  is lower than CaL,  $A_n$  will be limited by Rubisco carboxylation. If  $C_i$  is higher than CaH,  
3  $A_n$  will be limited by RuBP regeneration. If  $C_i$  is higher than CaL and lower than CaH,  $A_n$  will  
4 be the minimum between  $A_{ci}$  and  $A_{ji}$ .

5 In this calculation, we take  $K_c$ ,  $K_o$ ,  $\gamma^*$ ,  $K_p$ ,  $\alpha$  and  $g_{bs}$  as given (input parameters), similar  
6 to Sharkey et al. (2007), to avoid over-parameterizing the FvCB model (Gu et al. 2010). We  
7 conduct further sensitivity analyses in the following section to determine the effects of variability  
8 of these inputs parameters on the estimation results.

9 We used two fitting procedures in the current study: one was from Sharkey et al. (2007),  
10 which is an implicit minimization of error (Supplementary Material I), and the other one was  
11 based on the explicit calculations given by Yin et al. (2011b) (Supplementary Material II). For  
12 the method of Sharkey et al. (2007), "estimated"  $A_n$  was calculated using the above equations  
13 and observed  $A_n$  values. We call them "estimated", because when we calculate  $A_n$ , observed  $A_n$   
14 are used to calculate some intermediate parameters, for example  $C_m$ . We calculated  $C_m$  and  $O_{bs}$   
15 using eq. (5) and eq. (9) and two sets of  $V_p$  values using eq. (10) and eq. (14). We use the  $V_p$   
16 value for each observation to calculate  $C_{bs}$  using eq. (4), which we then use to calculate  $A_c$  and  $A_j$   
17 using eq. (12) and eq. (15) (or eq. (16)). The objective function is to minimize the sum of square  
18 errors between "estimated"  $A_n$  and observed  $A_n$  (Simulation Error in Supplementary Material I).  
19 We calculated the real estimation errors after finishing the fitting procedure (True Error).

1 Yin et al. (2011b) gave the explicit results of RuBP carboxylation and PEPc carboxylation  
2 limited assimilation (AEE), RuBP carboxylation and PEPc regeneration limited assimilation  
3 (ATE), RuBP regeneration and PEPc carboxylation limited assimilation (AET) and RuBP  
4 regeneration and PEPc regeneration limited assimilation (ATT). "Explicit" here means the  
5 assimilation rate are totally calculated by the estimated parameters without calculating the  
6 intermediates with observed  $A_n$ . The determination process of  $A_n$  is as follows:

$$\text{If } (V_{pc} < V_{pr}), A_c = AEE, A_j = AET, \text{ otherwise } A_c = ATE, A_j = ATT \quad (23)$$

$$A_n = \min (A_c, A_j), \quad (24)$$

7 which we use for our estimation method (Supplementary Material II).

## 8 **Checking inadmissible fits**

9 We made it possible to check the inadmissible fits for limitation states in our estimation method  
10 (Supplementary Material I, II). After the estimation process finishes, the limitation states based  
11 on the estimated parameters will be calculated at the last column. If the calculated limitation  
12 states are inconsistent with the assigned ones in the estimation method, one needs to readjust the  
13 assignment of the "Estimate Limitation" (adjust CaL or CaH) and rerun the estimation method,  
14 until they are consistent with each other.

## 15 **Temperature dependence of parameters or adjusting for temperature**

16 In the models,  $K_c$ ,  $K_o$ ,  $V_{cmax}$ ,  $V_{omax}$ ,  $J_{max}$ ,  $V_{pmax}$ ,  $K_p$ ,  $\gamma^*$  and  $g_m$  are temperature dependent  
17 (Table 1).  $K_c$ ,  $K_o$ ,  $V_{cmax}$ ,  $J$  and  $\gamma^*$  follow the Arrhenius exponential functions (Bernacchi et al.  
18 2001, 2003).  $V_{pmax}$  and  $g_m$  follow a bell-shaped model (Massad et al. 2007; Hardley et al. 1992;  
19 Bernacchi et al. 2002).  $K_p$  follows the  $Q_{10}$  function (Vico and Porporato 2008; Chen et al. 1994).

1 The temperature dependence equations for them are as follows:

$$K_o = K_o(25)e^{(c-\Delta H_a)/(RT_k)} \quad (25)$$

$$K_c = K_c(25)e^{(c-\Delta H_a)/(RT_k)} \quad (26)$$

$$V_{cmax} = V_{cmax}(25)e^{(c-\Delta H_a)/(RT_k)} \quad (27)$$

$$\gamma^* = \gamma^*(25)e^{(c-\Delta H_a)/(RT_k)} \quad (28)$$

$$J = J(25)e^{(c-\Delta H_a)/(RT_k)} \quad (29)$$

$$V_{pmax} = \frac{e^{c-\Delta H_a/(RT_k)}}{1 + e^{(\Delta S(T_l+273)-\Delta H_d)/R(T_l+273)}} \quad (30)$$

$$g_m = \frac{e^{c-\Delta H_a/(RT_k)}}{1 + e^{(\Delta S(T_l+273)-\Delta H_d)/R(T_l+273)}} \quad (31)$$

$$K_p = K_p(25)Q_{10}^{T_k/(10-2.5)}, \quad (32)$$

2 where  $x(25)$  is the value of parameter at  $25^\circ C$ ,  $\Delta H_a$  represents enthalpies of activation,  $R$  is the  
 3 molar gas constant of  $0.008314 \text{ kJK}^{-1}\text{mol}^{-1}$ ,  $T_k$  is the leaf temperature in K,  $\Delta H_d$  is a term of  
 4 deactivation and  $\Delta S$  is a term of entropy and  $Q_{10}$  represents is a measure of the rate of change of  
 5 a biological system as a consequence of increasing the temperature by  $10^\circ C$ .

6  $A/C_i$  curves can be measured at any temperature as long as the temperature remain constant  
 7 during the measurements. The temperature dependence parameters are given (Table 1), based on  
 8 which all the input parameters will be adjusted to the leaf temperatures at which  $A/C_i$  curves are  
 9 measured . Then, using the temperature adjusted input parameters, the estimation method will first  
 10 fit the output parameters at the leaf temperature and, further, calculate the output parameters at  
 11 standard temperature ( $25^\circ C$ ) based on the temperature response parameters of output parameters  
 12 (Table 1). Since there are fewer studies that measure the temperature response parameters for  $C_4$ ,  
 13 we made the assumption that although the value of the parameters at standard temperature ( $25^\circ C$ )

1 (i.e.  $x(25)$ ) change for  $C_4$ , the other temperature response parameters (i.e.  $\Delta H_a$ ,  $\Delta H_d$ ,  $\Delta S$  and  
2  $Q_{10}$ ) are relatively conserved for  $C_3$  and  $C_4$ . Parameters in Table 1 could be replaced with further  
3 measurements for  $C_4$ .

## 4 **RESULTS**

### 5 **Estimation results and sensitivity analysis**

6 Estimation methods based on the two equations of different assumptions about electron transport  
7 between RuBP regeneration and PEP carboxylation/regeneration yield consistent parameter  
8 estimates and assimilation- $CO_2$  response curves (Fig. 2, Supplementary material I and III), but  
9 there were minor differences. The second assumption that ATP, resulting from electron transport,  
10 is freely allocated between PEP carboxylation-regeneration and RuBP regeneration leads to a bump  
11 at low low  $CO_2$  when estimating  $A_j$ . The two assumptions produce different  $A_j$  under low  $CO_2$ ;  
12 but this is largely inconsequential because under low  $CO_2$ , assimilation is usually limited by  $A_c$ .

13 The two fitting procedures also give similar estimation results with only slight differences  
14 (Supplementary material I and II). Yin et al.'s equation gives solutions with smaller overall error,  
15 but it is more sensitive to the limitation assignment, making it easy to get "unbalanced results"  
16 between Rubisco carboxylation and RuBP regeneration (Supplementary IV). Fig 3 shows an  
17 example of unbalanced simulation results using 10 Pa as CaL:  $A_c$  and  $A_j$  are similar at low  $C_i$  and  
18 one of them shows clear redundancy at high  $C_i$ . Thus, the range of variation in the transition point  
19 must be limited to a smaller range, say 20-50 Pa, for example. Sharkey et al.'s method is more  
20 robust with respect to balanced results, but it gives a slightly higher sum of error than Yin et al.'s  
21 method when unbalanced results are readjusted (Supplementary Material IV).



1 Our estimation methods assume the parameters,  $K_c$ ,  $K_o$ ,  $\gamma^*$ ,  $K_p$ ,  $\alpha$  and  $g_{bs}$  to be constants;  
2 yet these parameters can vary widely in nature (Cousins et al. 2010) and it is therefore important  
3 to know how sensitive our results are to variation in these parameters. We conducted sensitivity  
4 analysis for variation in these parameters on the estimated  $V_{cmax}$ ,  $J$ ,  $R_d$ ,  $V_{pmax}$  and  $g_m$ . Sensitivity  
5 analysis showed  $V_{cmax}$  and  $J$  are quite robust under the variation of  $K_c$ ,  $K_o$ ,  $\gamma^*$ ,  $K_p$ ,  $\alpha$  and  $g_{bs}$ ,  
6 while  $R_d$ ,  $V_{pmax}$  and  $g_m$  were somewhat input dependent(Fig. 4).  $V_{pmax}$  is robust under all the  
7 other parameters except for the  $K_p$ .  $R_d$  and  $g_m$  show significant sensitivity to changes in  $K_p$  and to  
8 a lesser extent to  $K_c$  and  $g_{bs}$ . Thus,  $V_{cmax}$ ,  $J$  and  $V_{pmax}$  are reliable from this estimation method.  
9 With external measurement methods as discussed in the following section, one can estimate more  
10 reliable  $R_d$  and  $g_m$ ; supplementary Material V shows the how to change the Macro in Excel  
11 Solver.

## 12 **Validation of the estimation methods**

13 In order to test our estimation methods, we first conducted simulation test with manipulated error  
14 terms. We use the estimated parameters for our nine species to simulate new data sets using the  
15  $C_4$  photosynthesis equation based on the first assumption of electron transport and adding error  
16 terms to the assimilation rates. The error terms were randomly drawn from a normal distribution  
17 of mean zero and standard deviation of 0.1 or 0.2. Estimating simulated data sets gave us an idea  
18 about how likely we can capture the real parameters of the species given unavoidable errors in  
19 measurements. The results show that robust estimation results for  $V_{cmax}$ ,  $J$ ,  $V_{pmax}$  and  $R_d$  can be  
20 obtained. However, some estimation results of  $g_m$  show some deviation from the real values (Fig.  
21 5).

1 To test whether our estimation method could give accurate predictions across typical  
2 prediction scenarios, ( $CO_2$  ranging from 15 Pa to 65 Pa), we performed out of sample tests for  
3 our nine target species. To perform these tests, we removed five points of  $CO_2$  concentrations  
4 between 15 and 65 Pa range out of the  $A/C_i$  curves and used the rest of the  $A/C_i$  curves to  
5 estimate parameters. And then we used these parameters to predict the assimilation rate under the  
6  $CO_2$  concentrations we took out before and further, calculated the estimation errors. In general,  
7 the estimation errors for all our species were small (Table 2).

## 8 **Validating transition point range**

9 We used chlorophyll fluorescence measurements from seven  $C_4$  species to test whether the upper  
10 and lower boundary  $CO_2$  concentrations, CaL and CaH, are reasonable (Table 3). Fluorescence  
11 analysis (Baker et al. 2007) is a powerful tool for identifying the limitation state of  $C_3$  species  
12 (Sharkey et al. 2007). If Chlorophyll fluorescence is increasing with increasing  $CO_2$ ,  $A_n$  is  
13 limited by Rubisco carboxylation limited; when Chlorophyll fluorescence stays constant with  
14 increasing  $CO_2$ ,  $A_n$  is limited by RuBP regeneration. For  $C_4$  species, however, the situation  
15 is more complicated. Since  $V_p$  could be limited by  $V_{pr}$  and  $V_{pc}$  (eq. (11)). Part of the RuBP  
16 carboxylation limited condition and RuBP regeneration limited condition will mix together,  
17 leading to a linear increase of fluorescence with increasing of  $CO_2$ , but of a very small slope.  
18 Thus, we can only obtain two boundary  $CO_2$  concentrations. Below the lower boundary,  $A_n$  is  
19 Rubisco carboxylation limited; above the higher boundary,  $A_n$  is RuBP regeneration limited. We  
20 measured fluorescence to test whether the upper and lower boundary  $CO_2$  concentrations, CaL  
21 and CaH, are reasonable. Most of the CaL are above 15 Pa (lowest is around 14 Pa) and all the  
22 CaH are below 65 Pa. These results suggest that 15Pa-65Pa is a reasonable range to start with.

## 1 **DISCUSSION**

2 The photosynthetic parameters from the estimation method are good indicators for the biochemical  
3 and biophysical mechanisms underlying the photosynthesis processes of plants. Together with  
4 photosynthesis models, they can provide powerful information for evolutionary and ecological  
5 questions, as well as in efforts to improve crop productivity (Osborne & Beerling, 2006;  
6 Heckmann et al. 2013). Photosynthetic parameters represent different physiological traits, and  
7 comparison of these parameters within a phylogenetic background could help us to understand the  
8 further divergence of lineages and species through evolutionary time. Additionally, the response  
9 of productivity and carbon cycle of vegetation towards the future climate change depends heavily  
10 on photosynthesis parameter estimation.

11 Our estimation method shares with previous methods an underlying assumption that dark  
12 and light reactions optimally co-limit the assimilation rate (Sharkey et al. 2007; Yin et al. 2011b;  
13 Ubierna et al. 2013; Bellasio et al. 2015). This requires that there is some kind of optimization of  
14 nitrogen allocation of Rubisco carboxylation and RuBP regeneration. In our estimation method,  
15 we relax the optimization assumption to the extent that the transition point will be estimated  
16 instead of being assigned in advance. The optimality assumption is intuitive when we are  
17 considering there should be some mechanism to balance the resource distribution between dark  
18 and light reaction to avoid inefficiency. However, it is still possible that there is redundancy in  
19 nitrogen allocation in one reaction, which can cause the photosynthesis rate to be always limited  
20 by the dark or light reactions.

21 Our results show that despite a clear difference between the assumptions of how the products

1 of electron transport are distributed, the results are similar to each other, and comparable with  
2 studies using different models under measurements of high light intensity. However, under lower  
3 light intensity, assimilation rate will be limited more by  $A_j$ , and the two assumptions may start to  
4 show divergent results. In addition, since the fluorescence curves (Fig. 5), which represent the  
5 electron transport, do not show a transient bump, the first assumption should be more reliable.

6 Each of the two different fitting procedures has advantages and disadvantages. Yin's  
7 method uses the explicit calculation of assimilation rate, and consequently gives lower estimation  
8 error. However, it needs a more accurate assignment of limitation states, especially at the lower  
9 end. Thus, Yin's method will be preferable if one has additional support (e.g. fluorescence  
10 measurement) to define the limitation states; otherwise the Yin's method may give unbalanced  
11 results (Fig. 4). However, Sharkey's method usually can avoid unbalanced results even without  
12 ancillary measurements. Thus, it is better to use both procedures to support each other to find  
13 more accurate results. For example, one can first use Sharkey's method to get estimation results  
14 and limitation states, and then use them as initial values for Yin's method.

15 Although we have shown that parameter estimation can be achieved solely with  $A/C_i$   
16 curves, it is easy to combine our methods with ancillary measurements to yield more accurate  
17 estimation results by defining the parameters as estimated or known (Supplementary Material  
18 V). Chlorophyll fluorescence analysis discussed above is one potential external measurement.  
19 With reliable measurement of leaf absorptance ( $a$ ), chlorophyll fluorescence could be used to get  
20 quantum yield ( $\phi_{PSII}$ ) and to independently estimate electron transport rate ( $J$ ) by eq. (33):

$$J = \phi_{PSII} \times a \times I \times 0.5, \quad (33)$$

21 where  $I$  is the light intensity and 0.5 means partitioning of energy between PSI and PSII is

1 equivalent. However, in order to use fluorescence to estimate  $J$  for  $C_4$  species, the equation,  
2 leaf absorptance and energy partition between PSI and PSII should all be verified first for  $C_4$   
3 species. Yin et al. (2011b) propose a method to obtain  $R_d$  from the fluorescence-light curve,  
4 since the method used for  $C_3$  species, the Laisk method, is inappropriate (Yin et al. 2011a).  
5 Yin et al. (2011b) and Bellasio et al. (2015) also proposed methods to measure  $J$  using the  
6 fluorescence-light curves under regular (20%) and low (2%)  $O_2$  concentration. Flexas et al.  
7 (2007) discussed the estimation method of  $g_m$  for  $C_3$  species using the instantaneous carbon  
8 isotope discrimination, which could be generalized to estimate  $g_m$  for  $C_4$  species. With external  
9 measurement results, one can change estimated parameters (such as  $R_d$ ,  $g_m$  and  $J$ ) as input  
10 parameters in this curve fitting method. Furthermore, if  $R_d$ ,  $g_m$  or  $J$  are determined in the external  
11 measurements, one can also relax the input parameters (such as  $g_{bs}$ ) and make them as estimated  
12 parameters (Supplementary material V).

13 In this study, we present new accessible estimation tools for extracting  $C_4$  photosynthesis  
14 parameters from intensive  $A/C_i$  curves. Our estimation method is based on established estimation  
15 method for  $C_3$  plants and makes several improvements upon  $C_4$  photosynthesis models. External  
16 measurements for specific parameters will increase the reliability of estimation methods and are  
17 summarized independently. We tested two assumptions related to whether the electron transport  
18 is freely distributed between RuBP regeneration and PEP regeneration or certain proportions  
19 are confined to the two mechanisms. They show similar results under high light, but they may  
20 divergence under low light intensities. The two fitting procedures have distinct advantages and  
21 disadvantages and could be mutually supportive. Simulation test, out of sample test, fluorescence  
22 analysis and sensitivity analysis confirmed that our methods gave robust estimation especially for

1  $V_{cmax}$ ,  $J$  and  $V_{pmax}$ .

## 2 **ACKNOWLEDGMENT**

3 We sincerely thank Dr. Jesse Nippert, Kansas State University, for providing the fluorometer  
4 chamber for the measurement.

## 5 **The list of supplementary material**

6 Supplementary Material I. The estimation method of model 1 using Sharkey's fitting procedure.

7 Supplementary Material II. The estimation method of model 1 using Yin's fitting procedure.

8 Supplementary Material III. The estimation method of model 2 using Sharkey's fitting procedure.

9 Supplementary Material IV. Estimation results under CaL of 10 Pa or changing CaL to avoid the  
10 unbalanced estimated  $A_c$  and  $A_j$ .

11 Supplementary Material V. Instruction for use and set the solver macro.

12 Supplementary Material Table S1. Parameter abbreviation.

13 C4Estimation\_0.1.tar.gz is the R package which contains estimation methods of Sharkey's and

14 Yin's procedures for model 1.

## 1 REFERENCES

- 2 Baker N.R., Harbinson J. & Kramer D.M. (2007) Determining the limitations and regulation  
3 of photosynthetic energy transduction in leaves. *Plant, Cell and Environment* 30,  
4 1107–1125.
- 5 Bellasio C., Beerling D.J. & Griffiths H. (2015) Deriving  $C_4$  photosynthetic parameters from  
6 combined gas exchange and chlorophyll fluorescence using an Excel tool: theory and  
7 practice. *Plant, Cell and Environment* doi: 10.1111/pce.12626.
- 8 Bernacchi C.J., Singaas E.L., Pimentel C., Portis A.R. & Long S.P. (2001) Improved temperature  
9 response functions for models of Rubisco-limited photosynthesis. *Plant, Cell and*  
10 *Environment* 24, 253–259.
- 11 Bernacchi C.J., Portis A.R., Nakano H., von Caemmerer S. & Long S.P. (2002) Temperature  
12 response of mesophyll conductance. Implications for the determination of Rubisco enzyme  
13 kinetics and for limitations to photosynthesis in vivo. *Plant Physiology* 130, 1992-1998.
- 14 Bernacchi C.J., Pimentel C. & Long S.P. (2003) In vivo temperature response functions  
15 of parameters required to model RuBP-limited photosynthesis. *Plant, Cell and*  
16 *Environment* 26, 1419-1430.
- 17 Von Caemmerer S. (2000) Biochemical models of photosynthesis. In *Techniques in Plant*  
18 *Sciences* p. 196. CSIRO Publishing, Colingwood, Australia.
- 19 Chen D.-X., Coughenour M.B., Knapp A.K. & Owensby C.E. (1994) Mathematical simulation of  
20  $C_4$  grass photosynthesis in ambient and elevated  $CO_2$ . *Ecological Modelling* 73, 63–80.

- 1 Cousins A.B., Ghannoum O., von Caemmerer S. & Badger M.R. (2010) Simultaneous  
2 determination of Rubisco carboxylase and oxygenase kinetic parameters in *Triticum*  
3 *aestivum* and *Zea mays* using membrane inlet mass spectrometry. *Plant, Cell and*  
4 *Environment* 33, 444–452.
- 5 Dubois J.B., Fiscus E.L., Booker F.L., Flowers M.D. & Reid C.D.(2007) Optimizing the  
6 statistical estimation of the parameters of the Farquhar-von Caemmerer-Berry model of  
7 photosynthesis. *New Phytologist* 176, 402–414.
- 8 Ethier G.J., Livingston N.J., Harrison D.L., Black T.A. & Moran J.A. (2006) Low stomatal  
9 and internal conductance to  $CO_2$  versus Rubisco deactivation as determinants of the  
10 photosynthetic decline of ageing evergreen leaves. *Plant, Cell and Environment* 29,  
11 2168-2184.
- 12 Farquhar G.D., Von Caemmerer S. & Berry J.A. (1980) A biochemical model of photosynthetic  
13 carbon dioxide assimilation in leaves of 3-carbon pathway species. *Planta* 149, 78-90.
- 14 Flexas J., Diaz-Espejo A., Galmés J., Kaidenhoff R., Medrano H. & Ribas-Carbo M. (2007) Rapid  
15 variations of mesophyll conductance in response to changes in  $CO_2$  concentration around  
16 leaves. *Plant, Cell and Environment* 30, 1284-1298.
- 17 Gu L., Pallardy S.G., Tu K., Law B.E. & Wullschleger S.D. (2010) Reliable estimation of  
18 biochemical parameters from  $C_3$  leaf photosynthesis-intercellular carbon dioxide response  
19 curves. *Plant, Cell and Environment* 33, 1852-1874.
- 20 Hatch M.D. (1987).  $C_4$  photosynthesis: a unique blend of modified biochemistry, anatomy and  
21 ultrastructure. *Biochimica et Biophysica Acta* 895, 81-106.



- 1 Hardley P.C., Thomas R.B., Reynolds J.F. & Strain B.R. (1992) Modelling photosynthesis of  
2 cotton grown in elevated  $CO_2$ . *Plant, Cell and Environment* 15, 271-282.
- 3 Heckmann D., Schulze S., Denton A., Gowik U., Westhoff P., Weber A.P. & Lercher M.J. (2013)  
4 Predicting  $C_4$  photosynthesis evolution: Modular, individually adaptive steps on a Mount  
5 Fuji fitness landscape. *Cell* 153, 1579-1588.
- 6 Miao Z.W., Xu M., Lathrop R.G. & Wang Y.F. (2009) Comparison of the  $A-C_c$  curve fitting  
7 methods in determining maximum ribulose 1.5-bisphosphate carboxylase/oxygenase  
8 carboxylation rate, potential light saturated electron transport rate and leaf dark respiration.  
9 *Plant, Cell and Environment* 32, 1191-1204.
- 10 Massad R. S., Tuzet A. & Bethenod O. (2007) The effect of temperature on  $C_4$ -type leaf  
11 photosynthesis parameters. *Plant, Cell and Environment* 30, 109-122.
- 12 Osborne C.P. & Beerling D.J. (2006) Nature's green revolution: the remarkable evolutionary rise  
13 of C-4 plants. *Philosophical Transactions of The Royal Society B* 361, 173-194.
- 14 Osborne C.P. & Sack L. (2012) Evolution of C4 plants: a new hypothesis for an interaction of  
15  $CO_2$  and water relations mediated by plant hydraulics. *Philosophical Transactions of*  
16 *The Royal Society B* 367, 583-600.
- 17 Sharkey T.D., Bernacchi C.J., Farquhar G.D. & Singsaas E.L. (2007) Fitting photosynthetic  
18 carbon dioxide response curves for C3 leaves. *Plant, Cell and Environment* 30,  
19 1035–1040.
- 20 Ubierna N., Sun W., Kramer D.M. & Cousins A.B. (2013) The efficiency of  $C_4$  photosynthesis

- 1 under low light conditions in *Zea mays*, *Miscanthus X giganteus* and *Flaveria bidentis*.  
2 *Plant, Cell and Environment* 36, 365-381.
- 3 Vico G. & Porporato A. (2008) Modelling  $C_3$  and  $C_4$  photosynthesis under water-stressed  
4 conditions. *Plant and Soil* 313, 187-203.
- 5 Xu L.K. & Baldocchi D.D. (2003) Seasonal trends in photosynthetic parameters and stomatal  
6 conductance of blue oak (*Quercus douglasii*) under prolonged summer drought and high  
7 temperature. *Tree Physiology* 23, 865-877.
- 8 Yin X., Struik P.C., Romero P., Harbinson J., Evers J.B., Van Der Putten P.E.L. & Vos J.A.N.  
9 (2009) Using combined measurements of gas exchange and chlorophyll fluorescence to  
10 estimate parameters of a biochemical  $C_3$  photosynthesis model: a critical appraisal and  
11 a new integrated approach applied to leaves in a wheat (*Triticum aestivum*) canopy.  
12 *Plant, Cell and Environment* 32, 448-464.
- 13 Yin X., Sun Z., Struik P.C. & Gu J. (2011a) Evaluating a new method to estimate the rate of leaf  
14 respiration in the light by analysis of combined gas exchange and chlorophyll fluorescence  
15 measurements. *Journal of Experimental Botany* 62, 3489-3499.
- 16 Yin X.Y., Sun Z.P., Struik P.C., Van der Putten P.E.L., Van Ieperen W. & Harbinson J.  
17 (2011b) Using a biochemical  $C_4$  photosynthesis model and combined gas exchange  
18 and chlorophyll fluorescence measurements to estimate bundle-sheath conductance of  
19 maize leaves differing in age and nitrogen content. *Plant, Cell and Environment* 34,  
20 2183-2199.

Table 1. Temperature dependence of photosynthesis parameters.

|                                                               | 25°C                  | c       | $\Delta H_a/Q_{10}$ | $\Delta H_d$       | $\Delta S$        |
|---------------------------------------------------------------|-----------------------|---------|---------------------|--------------------|-------------------|
| Input parameters adjustment                                   |                       |         |                     |                    |                   |
| $K_c$ (Pa)                                                    | 65 <sup>a</sup>       | 36.8472 | 80.99 <sup>b</sup>  |                    |                   |
| $K_o$ (kPa)                                                   | 45 <sup>a</sup>       | 13.3757 | 23.72 <sup>b</sup>  |                    |                   |
| $\gamma^*$                                                    | 0.000193 <sup>a</sup> | 1.3148  | 24.46 <sup>b</sup>  |                    |                   |
| $K_p$ (Pa)                                                    | 8 <sup>a</sup>        | 2.629   | 2.1 <sup>c</sup>    |                    |                   |
| Output parameters adjustment                                  |                       |         |                     |                    |                   |
| $V_{cmax}$ ( $\mu\text{mol m}^{-2} \text{s}^{-1}$ )           |                       | 26.355  | 65.33 <sup>b</sup>  |                    |                   |
| $J$ ( $\mu\text{mol m}^{-2} \text{s}^{-1}$ )                  |                       | 17.71   | 43.9 <sup>d</sup>   |                    |                   |
| $TPU$ ( $\mu\text{mol m}^{-2} \text{s}^{-1}$ )                |                       | 21.46   | 53.1 <sup>e</sup>   | 201.8 <sup>e</sup> | 0.65 <sup>e</sup> |
| $V_{pmax}$ ( $\mu\text{mol m}^{-2} \text{s}^{-1}$ )           |                       | 29.393  | 70.37 <sup>f</sup>  | 117.9 <sup>f</sup> | 0.4 <sup>f</sup>  |
| $R_d$ ( $\mu\text{mol m}^{-2} \text{s}^{-1}$ )                |                       | 18.715  | 46.39 <sup>b</sup>  |                    |                   |
| $g_m$ ( $\mu\text{mol m}^{-2} \text{s}^{-1} \text{Pa}^{-1}$ ) |                       | 20.01   | 49.6 <sup>g</sup>   | 437.4 <sup>g</sup> | 1.4 <sup>g</sup>  |

$c$  (scaling constant),  $\Delta H_a$  (enthalpies of activation),  $\Delta H_d$  (enthalpies of deactivation),  $\Delta S$  (entropy) and  $Q_{10}$  (rate of change as a consequence of increasing the temperature by 10°C, for  $K_p$ ) are parameters for temperature response of photosynthesis parameters.  $K_c$ , Michaelis-Menten constant of Rubisco activity for  $\text{CO}_2$ ;  $K_o$ , Michaelis-Menten constant of Rubisco activity for  $\text{O}_2$ ;  $\gamma^*$ , specificity of Rubisco;  $K_p$ , Michaelis-Menten constant of PEPc activity for  $\text{CO}_2$ ;  $V_{cmax}$ , maximal velocity of carboxylation for Rubisco;  $J$ , rate of electron transport;  $TPU$ , triose phosphate use;  $V_{pmax}$ , maximal velocity of carboxylation for PEPc;  $R_d$ , mitochondrial respiration rate in the daytime;  $g_m$ , mesophyll conductance.

<sup>a</sup>von Caemmerer (2000), <sup>b</sup>Bernacchi et al.(2001), <sup>c</sup>Chen et al.,1994, <sup>d</sup>Bernacchi et al.(2003), <sup>e</sup>Hardley et al. (1992), <sup>f</sup>Massad et al. (2007), <sup>g</sup>Bernacchi et al.(2002)

Table 2. Out of sample test results. Five measured points from 15 Pa-65 Pa were taken out when we conducted the estimation process. Then the calculated assimilation rates under these five CO<sub>2</sub> concentrations were compared with the measured ones. The data shows difference between the calculated and measured assimilation rates (mean(standard error) with unit  $\mu\text{mol m}^{-2} \text{s}^{-1}$ ).

| Species          | <i>A. virginicus</i> | <i>Z. mays</i>   | <i>E. trichodes</i> | <i>S. scoparium</i>   | <i>P. virgatum</i> |
|------------------|----------------------|------------------|---------------------|-----------------------|--------------------|
| Sharkey's method | -0.115 (0.056)       | 0.075(0.121)     | 0.018 (0.059)       | -0.302 (0.071)        | 0.098(0.091)       |
| Yin's method     | -0.128(0.056)        | -0.104(0.083)    | 0.003 (0.059)       | -0.013(0.071)         | 0.018(0.091)       |
| Species          | <i>P. amarum</i>     | <i>S. faberi</i> | <i>S. nutans</i>    | <i>T. dactyloides</i> |                    |
| Sharkey's method | -0.135(0.077)        | -0.109(0.056)    | -0.103(0.069)       | -0.105(0.102)         |                    |
| Yin's method     | -0.102(0.076)        | -0.115(0.056)    | -0.043(0.069)       | -0.095(0.102)         |                    |

Table 3. CO<sub>2</sub> concentration boundaries results for assimilation limited conditions from fluorescence measurements for seven species. CaL: CO<sub>2</sub> concentration under which assimilation rate is limited by Rubisco carboxylation. CaH: CO<sub>2</sub> concentration under which assimilation rate is limited by RuBP regeneration.

| Species | <i>P. virgatum</i>    | <i>P. amarum</i> | <i>S. scoparium</i> | <i>S. nutans</i> |
|---------|-----------------------|------------------|---------------------|------------------|
| CaL(Pa) | 14.1(1.12)            | 18.0(1.09)       | 17.8(1.09)          | 17.6(0.28)       |
| CaH(Pa) | 34.1(1.78)            | 55.5(1.40)       | 53.1(1.10)          | 63.1(2.07)       |
| Species | <i>T. dactyloides</i> | <i>T. flavus</i> | <i>B. mutica</i>    |                  |
| CaL(Pa) | 13.8(0.35)            | 14.9(2.35)       | 15.8(1.13)          |                  |
| CaH(Pa) | 46.1(0.20)            | 41.4(1.73)       | 42.3(1.24)          |                  |

## Figure Captions

Fig. 1. An introduction of how our estimation method assigns transition points between limitation states.  $A_c$  represents RuBP carboxylation limited assimilation rate,  $A_j$  represents RuBP regeneration limited assimilation rate. Transition point is given by the interaction of the  $A_c$  and  $A_j$  curves. Our algorithm allows the transition point to vary from a lower bound (CaL, 15 Pa for example) and a higher bound (CaH, 65 Pa for example), indicated by the dashed vertical lines in the figure.

Fig. 2. Assimilation- $\text{CO}_2$  response curves ( $A/C_i$ ) generated using  $\text{C}_4$  photosynthesis of two different assumptions. Photosynthetic parameters ( $V_{\text{cmax}}$ ,  $J$ ,  $R_d$ ,  $V_{\text{pmax}}$  and  $g_m$ ) are the same for both assumptions.  $A_c$  represents RuBP carboxylation limited assimilation,  $A_j$ \_Assumption 1 represents results of the assumption that no matter how much electron transport is used for PEP carboxylation/regeneration, a certain amount ( $xJ$ ) is confined for this use, and  $A_j$ \_Assumption 2 represents results of the assumption that electron transport can be freely distributed between PEP carboxylation/regeneration and RuBP regeneration. Parameters are estimated from  $A/C_i$  curve of *Schizachyrium scoparium* (Michx.) Nash under light intensity of  $1500 \mu\text{mol m}^{-2} \text{s}^{-1}$ . The figure shows that although the models for  $A_j$  differ at low  $\text{CO}_2$  concentrations, this difference is inconsequential, because the assimilation rate is limited by  $A_c$  at that range.

Fig. 3. An example of unbalanced results by using 10 Pa as CaL in estimation method. Compare estimated results ( $A_c$  and  $A_j$ ) using Yin's estimation method with CaL of 10 Pa and 15 Pa and observed  $A$  ( $A_{\text{obs}}$ ) under different  $C_i$  concentrations. The data are from *Eragrostis trichodes* (Nutt.) Alph. Wood under light intensity of  $1500 \mu\text{mol m}^{-2} \text{s}^{-1}$ . The estimated  $A$  is the minimum of  $A_c$  and  $A_j$ .

Fig. 4. Sensitivity analysis of five estimation parameters to the variation in six input parameters. Relative changes in the estimated  $V_{\text{cmax}}$ ,  $J$ ,  $R_d$ ,  $V_{\text{pmax}}$  and  $g_m$  in response to

the relative change of six input parameters [(a)  $\alpha$ , (b)  $K_p$ , (c)  $K_o$ , (d)  $K_c$ , (e)  $\gamma^*$  and (f)  $g_{bs}$ ] from the initial values in Table 1. The relative change of estimated parameters refers to the ratio of estimated values at a changed input parameter to the estimated value at the initial value of that input parameter. The symbols represent the average change of the ten  $C_4$  species and error bars stand for standard error.

Fig. 5. Simulation tests for the estimated parameters using estimation methods of Yin's and Sharkey's fitting procedures. Data sets are generated by adding random errors for the modeling results using the known photosynthesis parameters of nine species. Small error refers to error term randomly chosen with mean 0 and standard deviation of 0.1 and bigger error refers to error term with randomly chosen mean 0 and standard deviation of 0.2.

Fig. 6. Quantum yield calculated from fluorescence measurement for two species. Dots represent *P. amarum* and diamonds represent *T. flavus*. Black dots/diamonds: Rubisco carboxylation limited states; grey dots/diamonds: co-limited states; open dots/diamonds: RuBP regeneration regeneration limited states.

Fig. 1

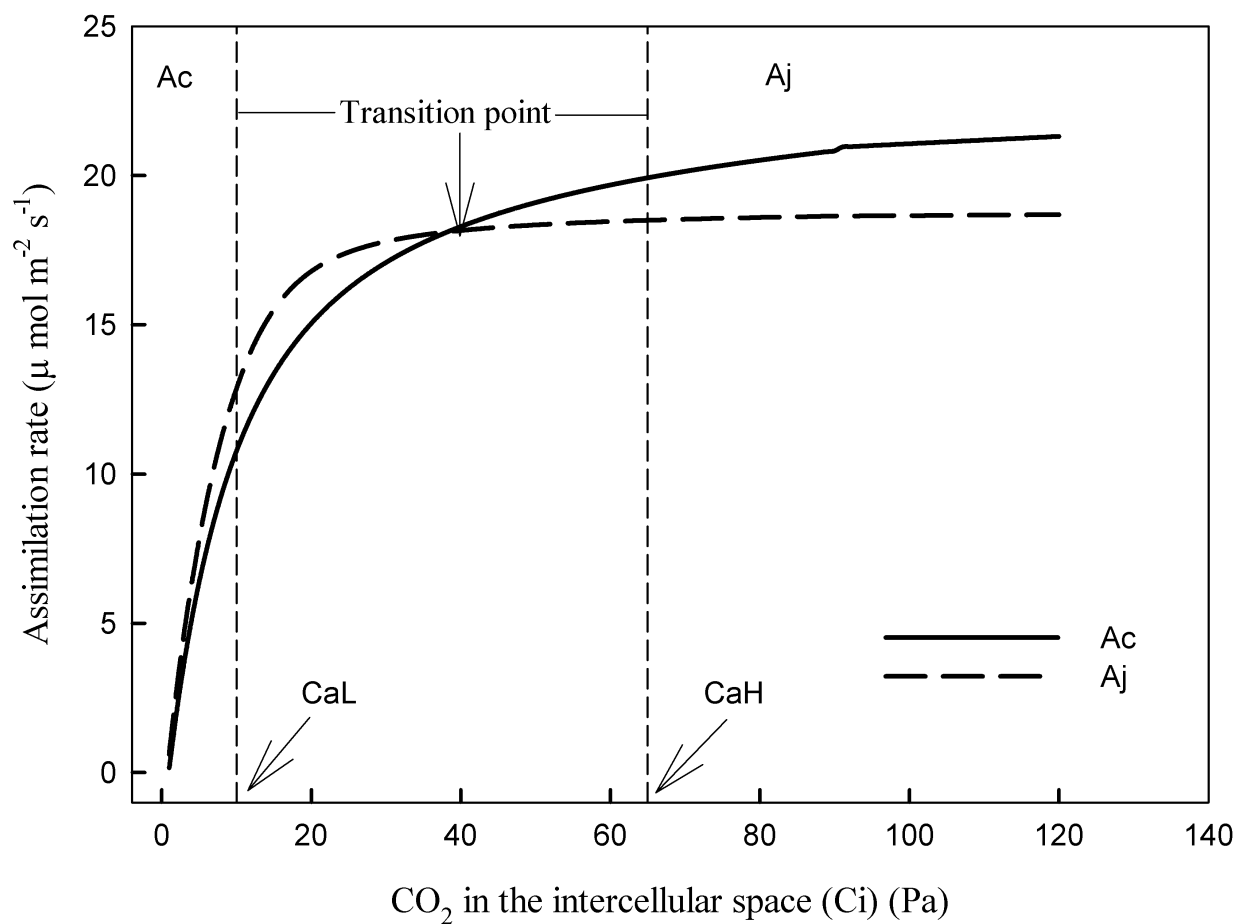



Fig. 2

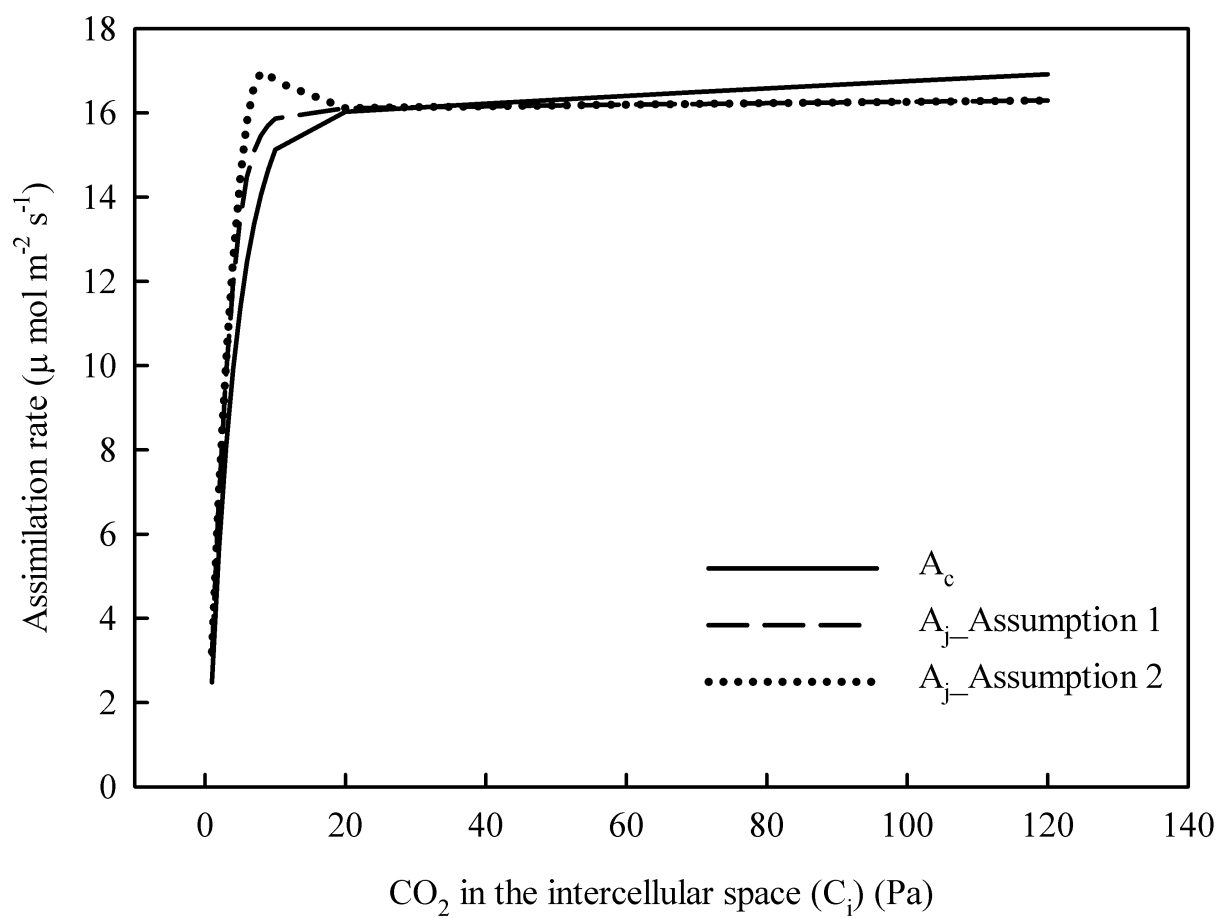

Fig. 3

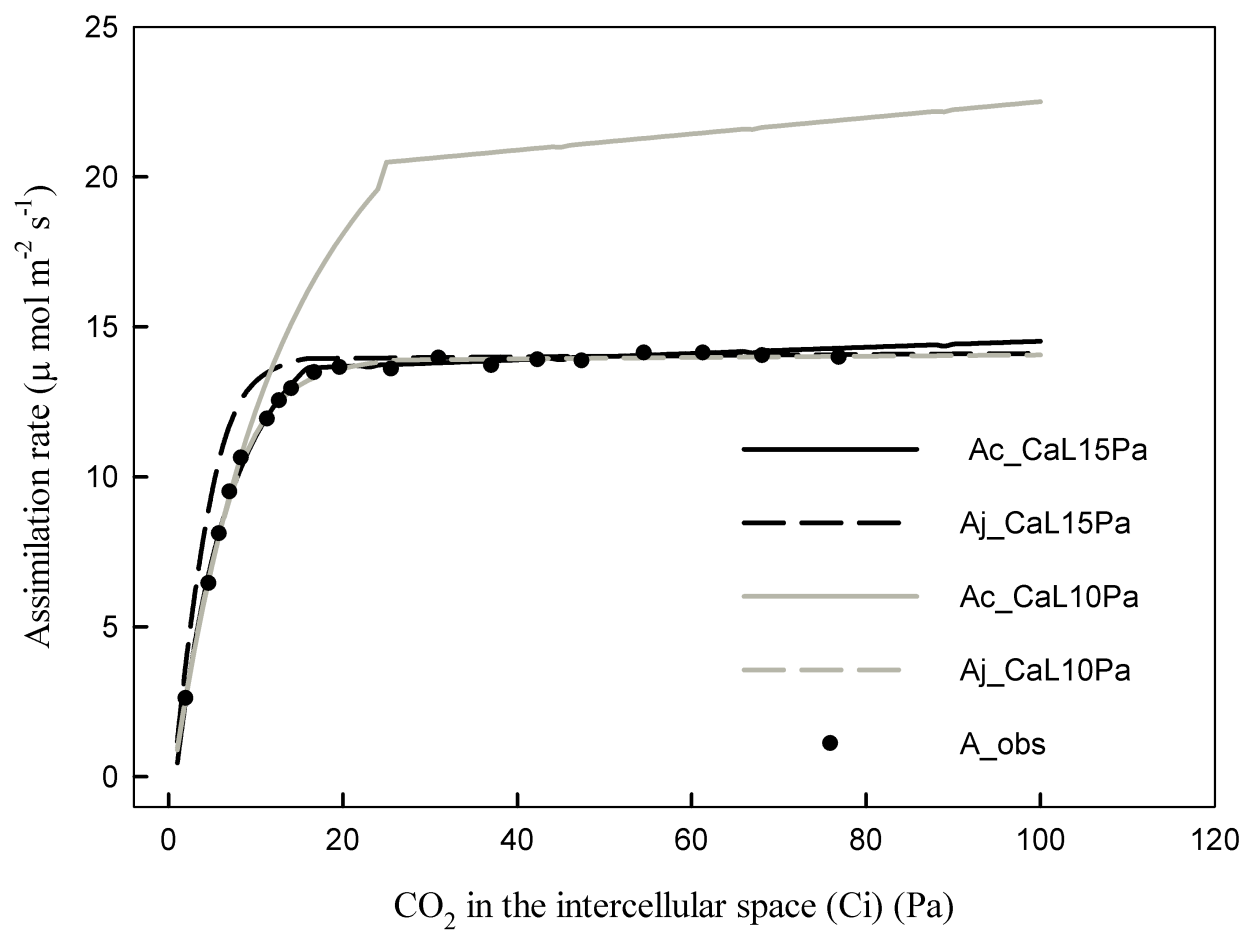

Fig. 4

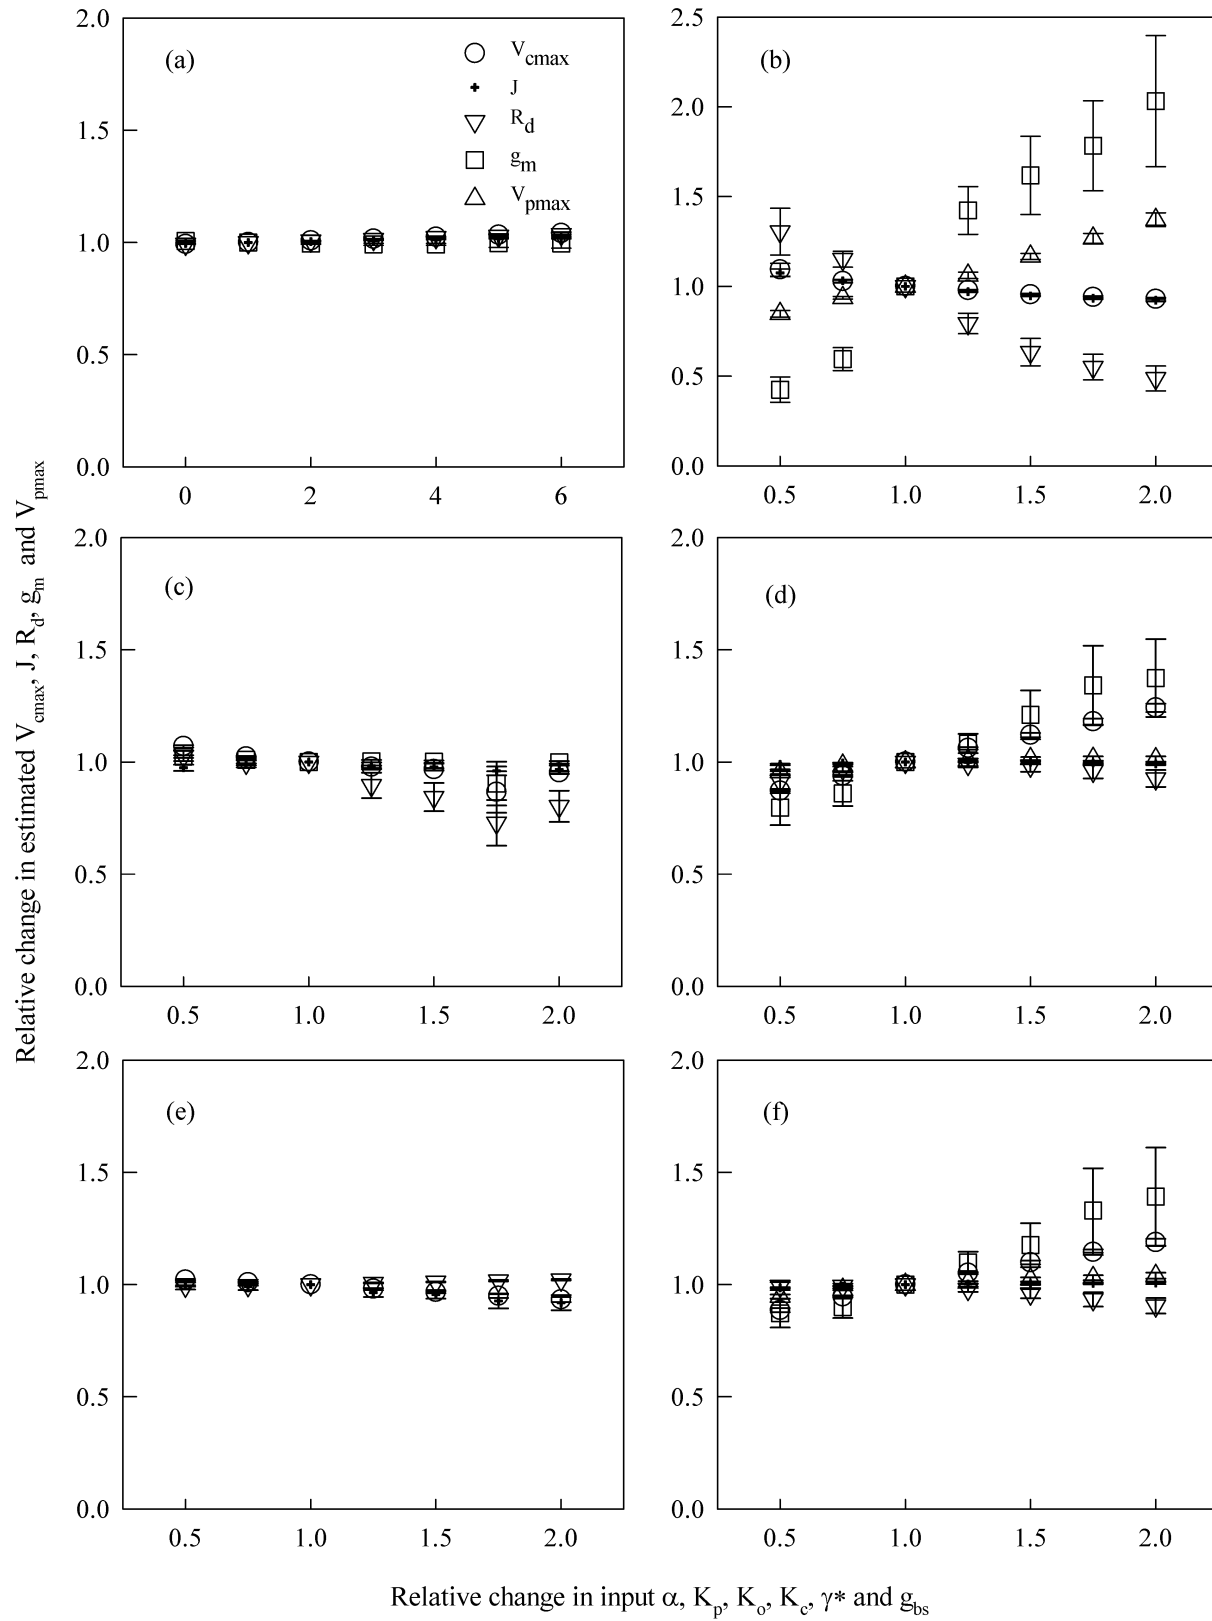

Fig. 5

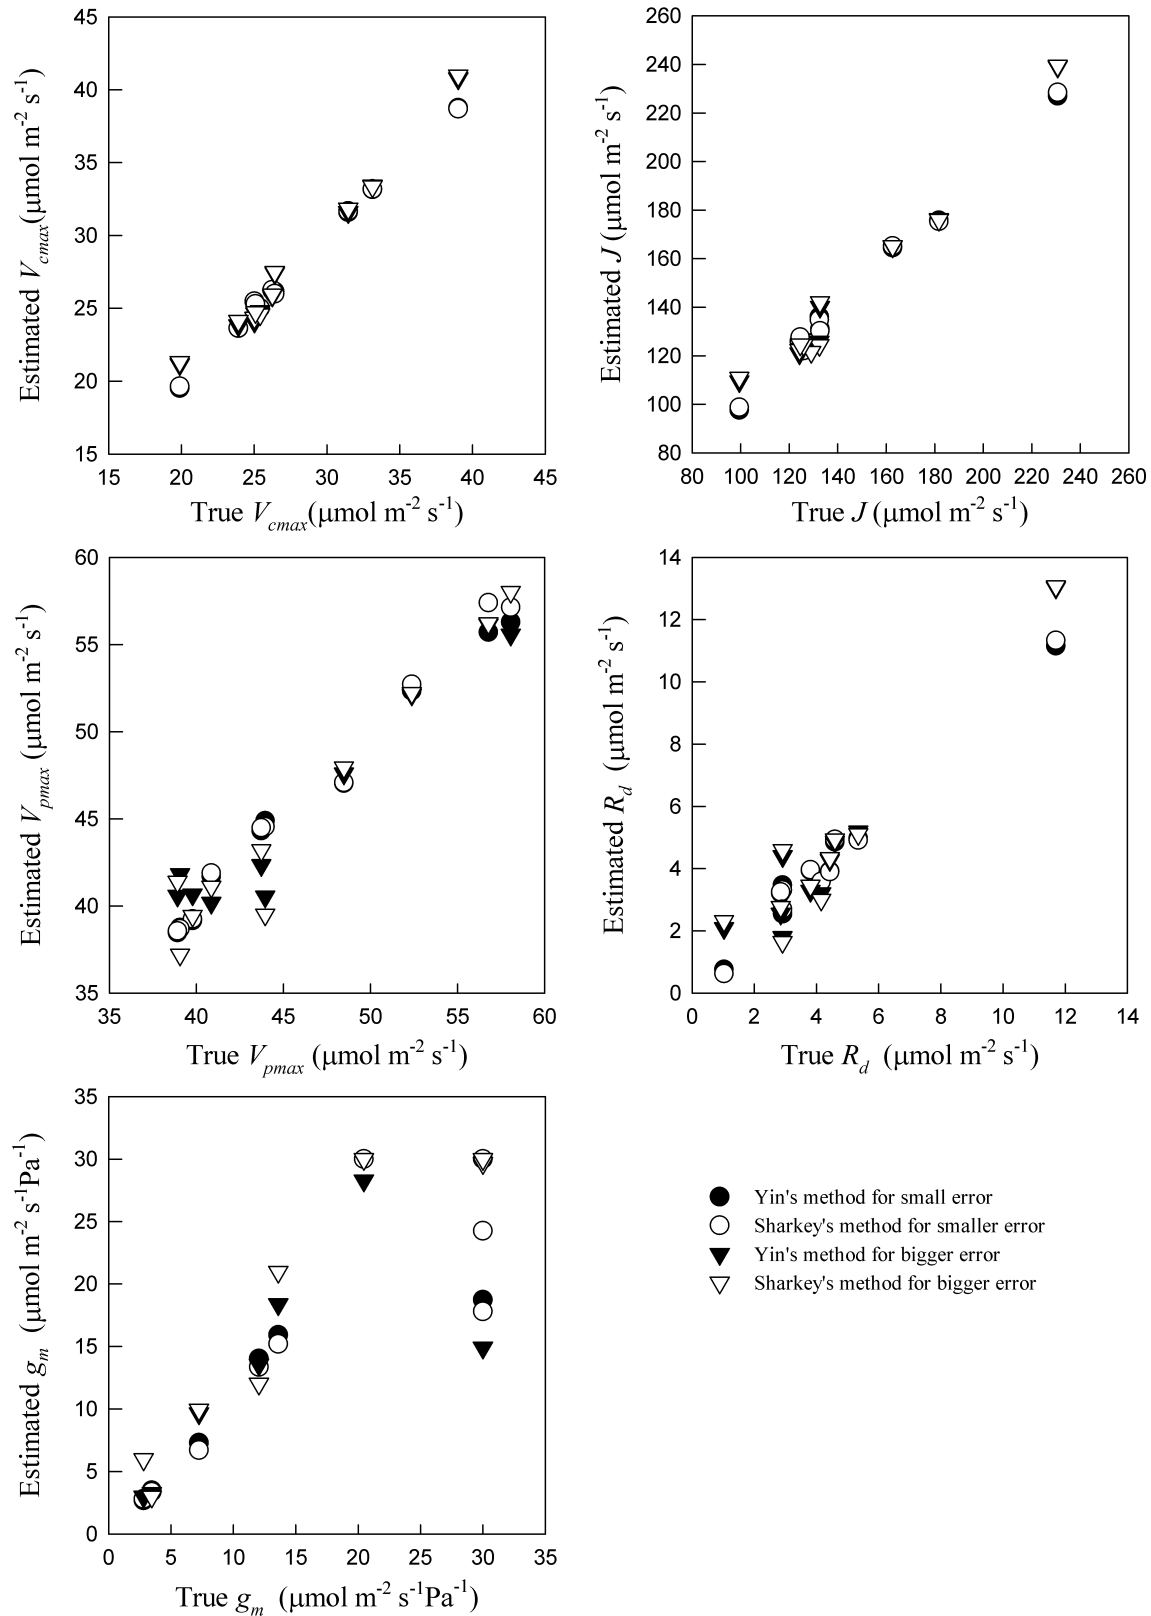

Fig. 6

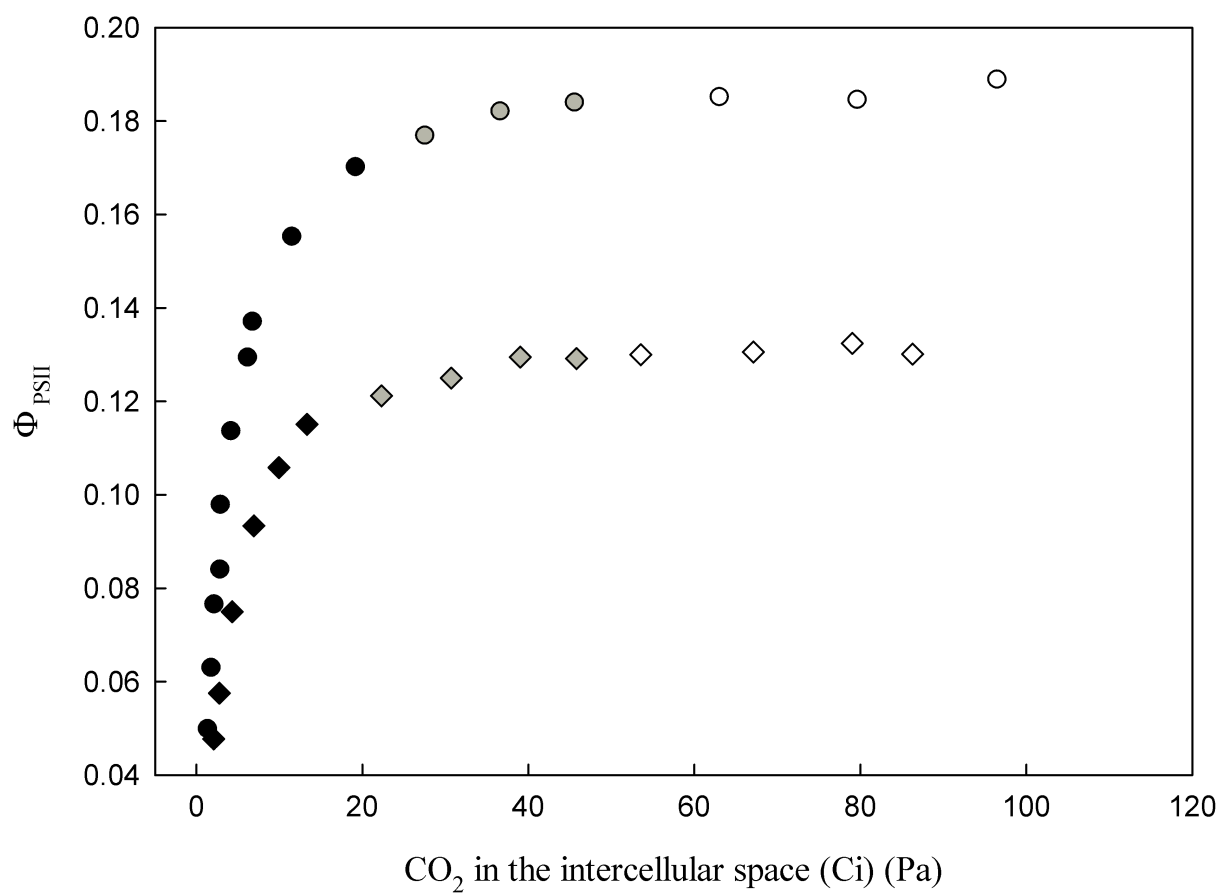

Source: http://www.biorxiv.org/content/10.1101/153072v1.full.pdf
